# Supplementary material for: Oxygen deficient Pr6O11 nanorod supported palladium nanoparticles: highly active nanocatalysts for styrene and 4-nitrophenol hydrogenation reactions
Source: Royal Society of Chemistry journal article supplement (doi:10.1039/c8ra02831a), 2018-01-01
Supplement: c8ra02831a1.pdf [file c8ra02831a1.pdf]

---

## Oxygen deficient Pr<sub>6</sub>O<sub>11</sub> nanorods supported palladium nanoparticles: highly active nanocatalysts for styrene and 4-nitrophenol hydrogenation reactions

Nan Jiang, Xiao Zhou, Yi-Fan Jiang, Zhi-Wei Zhao, Liu-Bo Ma, Cong-Cong Shen, Ya-Nan Liu, Cheng-Zong Yuan, Shafaq Sahar, An-Wu Xu\*

**Table S1** Comparison of the apparent rate constant *k* for the reduction of 4-NP over different palladium based catalyst systems. The actual weight content of Pd was 1.42 wt%.

| Entry | Catalyst                               | t (min) | k (s <sup>-1</sup> ) | Ref.      |
|-------|----------------------------------------|---------|----------------------|-----------|
| 1     | Pd/Pr <sub>6</sub> O <sub>11</sub>     | 3       | 0.0191               | our study |
| 2     | PPy/TiO <sub>2</sub> /Pd               | 7       | 0.0122               | [48]      |
| 3     | Al <sub>2</sub> O <sub>3</sub> /Pd     | 8       | 0.0112               | [49]      |
| 4     | SPB/Pd                                 | 20      | 0.0441               | [50]      |
| 5     | Fe <sub>3</sub> O <sub>4</sub> @C@PtPd | 1.3     | 0.0202               | [51]      |

k: apparent rate constant; t: conversion time.
